# Supplementary material for: Systematic analyses of genetic variants in chromatin interaction regions identified four novel lung cancer susceptibility loci
Source: PubMed Central journal article supplement (PMC6959073; doi:10.7150/jca.35127), 2020-01-01
Supplement: jcav11p1075s1.pdf [file jcav11p1075s1.pdf]

**Systematic analyses of genetic variants in chromatin interaction regions identified four novel lung cancer susceptibility loci**

Pei Ji <sup>1†</sup>, Dongsheng Ding <sup>1†</sup>, Na Qin <sup>1†</sup>, Cheng Wang <sup>1,2,3</sup>, Meng Zhu <sup>1,3</sup>, Yuancheng Li <sup>1</sup>, Juncheng Dai <sup>1,3</sup>, Guangfu Jin <sup>1,3</sup>, Zhibin Hu <sup>1,3</sup>, Hongbing Shen <sup>1,3</sup>, Liang Chen <sup>4\*</sup>, Hongxia Ma <sup>1,3\*</sup>

<sup>1</sup> Department of Epidemiology, Center for Global Health, School of Public Health, Nanjing Medical University, Nanjing, China.

<sup>2</sup> Department of Bioinformatics, School of Basic Medical Sciences, Nanjing Medical University, Nanjing, China.

<sup>3</sup> Jiangsu Key Lab of Cancer Biomarkers, Prevention and Treatment, Collaborative Innovation Center for Cancer Medicine, Nanjing Medical University, Nanjing, China.

<sup>4</sup> Department of Thoracic Surgery, The First Affiliated Hospital of Nanjing Medical University, Nanjing, China.

**Table S1. Patients' baseline characteristics in RNA-seq data.**

| <b>Variables</b>              | <b>LC patients<br/>(n=90)</b> |
|-------------------------------|-------------------------------|
| <b>Age</b>                    |                               |
| ≤ 60                          | 41(45.6)                      |
| >60                           | 49(54.4)                      |
| <b>Gender</b>                 |                               |
| Female                        | 26(28.9)                      |
| Male                          | 64(71.1)                      |
| <b>Smoking status</b>         |                               |
| Never                         | 40(44.4)                      |
| Ever                          | 50(55.6)                      |
| <b>Histological cell type</b> |                               |
| Squamous cell carcinoma       | 35(38.9)                      |
| Adenocarcinoma                | 55(61.1)                      |

**Table S2. Distributions of characteristics in NJMU and FLCCA lung cancer GWAS cases and controls**

| Variables               | NJMU-GWAS     |                  | FLCCA-GWAS    |                  | Overall       |                  |
|-------------------------|---------------|------------------|---------------|------------------|---------------|------------------|
|                         | Case<br>N (%) | Control<br>N (%) | Case<br>N (%) | Control<br>N (%) | Case<br>N (%) | Control<br>N (%) |
| <b>All</b>              | 2331(100)     | 3077(100)        | 4796(100)     | 3741(100)        | 7127(100)     | 6818(100)        |
| <b>Age</b>              |               |                  |               |                  |               |                  |
| ≤ 60                    | 1142(48.99)   | 1521(49.43)      | 2408(50.21)   | 2023(54.08)      | 3306(46.39)   | 3266(47.90)      |
| > 60                    | 1189(51.01)   | 1556(50.57)      | 2388(49.79)   | 1718(45.92)      | 3821(53.61)   | 3552(52.10)      |
| <b>Gender</b>           |               |                  |               |                  |               |                  |
| Male                    | 1711(73.40)   | 2086(67.79)      | n/a           | n/a              | 1711(24.01)   | 2086(30.60)      |
| Female                  | 620(26.60)    | 991(32.21)       | 4796(100)     | 3741(100)        | 5416(75.99)   | 4732(69.40)      |
| <b>Smoking</b>          |               |                  |               |                  |               |                  |
| Never                   | 825(35.39)    | 1768(57.46)      | 4796(100)     | 3741(100)        | 5621(78.87)   | 5509(49.50)      |
| Ever                    | 1506(64.61)   | 1309(42.54)      | n/a           | n/a              | 1506(21.13)   | 1309(42.54)      |
| <b>Histology</b>        |               |                  |               |                  |               |                  |
| Squamous cell carcinoma | 822(35.26)    | n/a              | 660(13.76)    | n/a              | 1482(20.79)   | n/a              |
| Adenocarcinoma          | 1304(55.94)   | n/a              | 3469(72.33)   | n/a              | 4773(66.97)   | n/a              |
| Other <sup>a</sup>      | 205(8.80)     | n/a              | 667(13.91)    | n/a              | 872(12.24)    | n/a              |

<sup>a</sup> : Other histological types include small cell lung cancer, large cell lung cancer and mixed cell lung cancer.

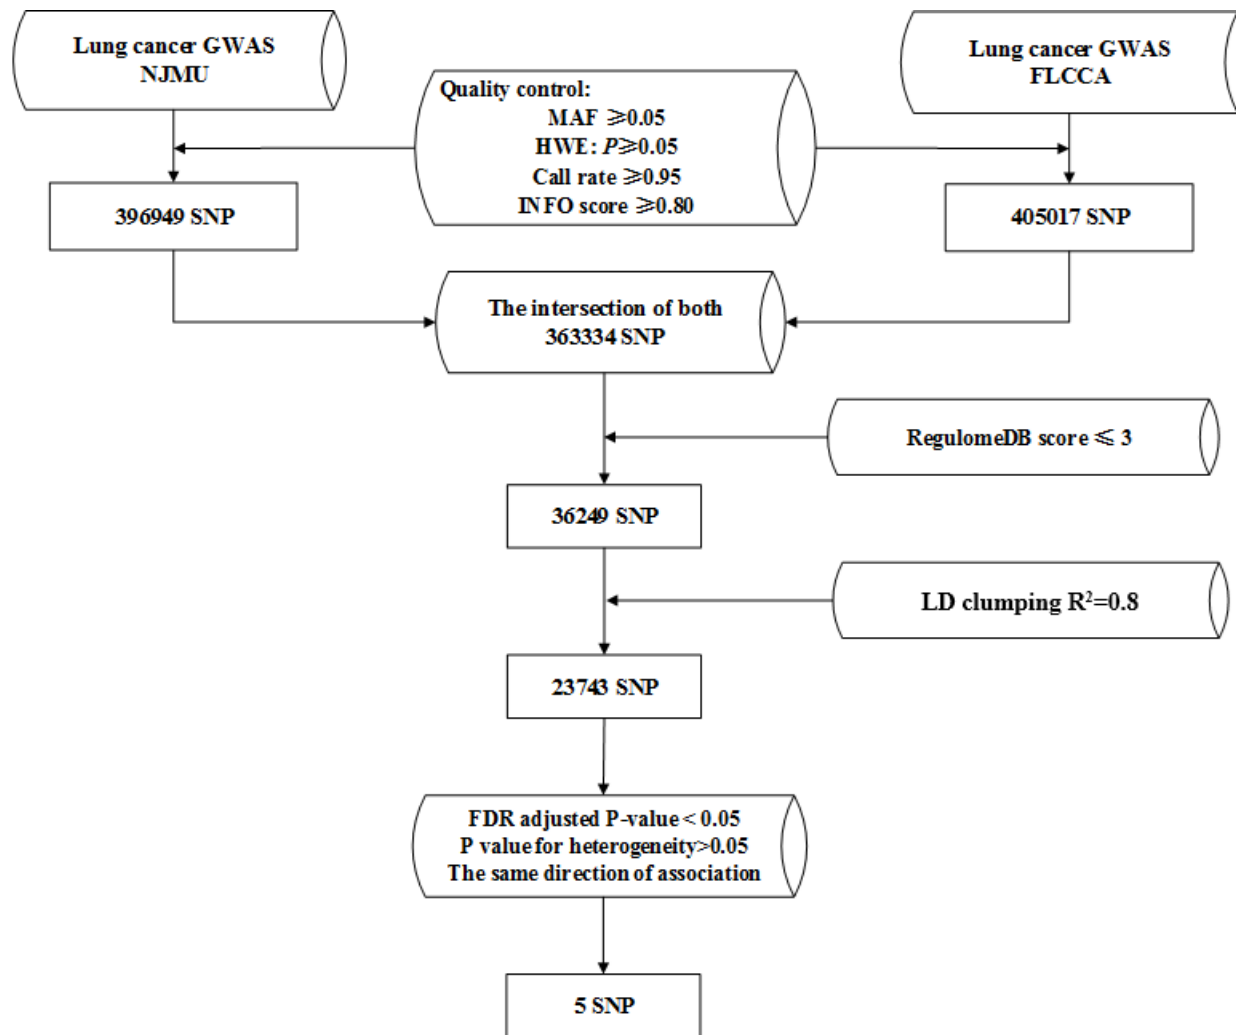

Figure S1. The workflow of SNPs screening based on two Asian GWAS data and meta-analysis.

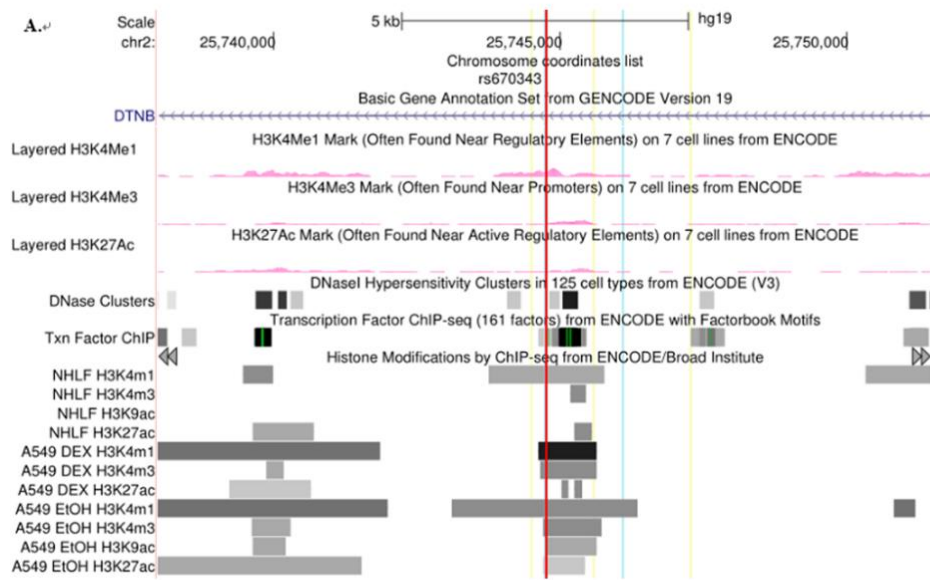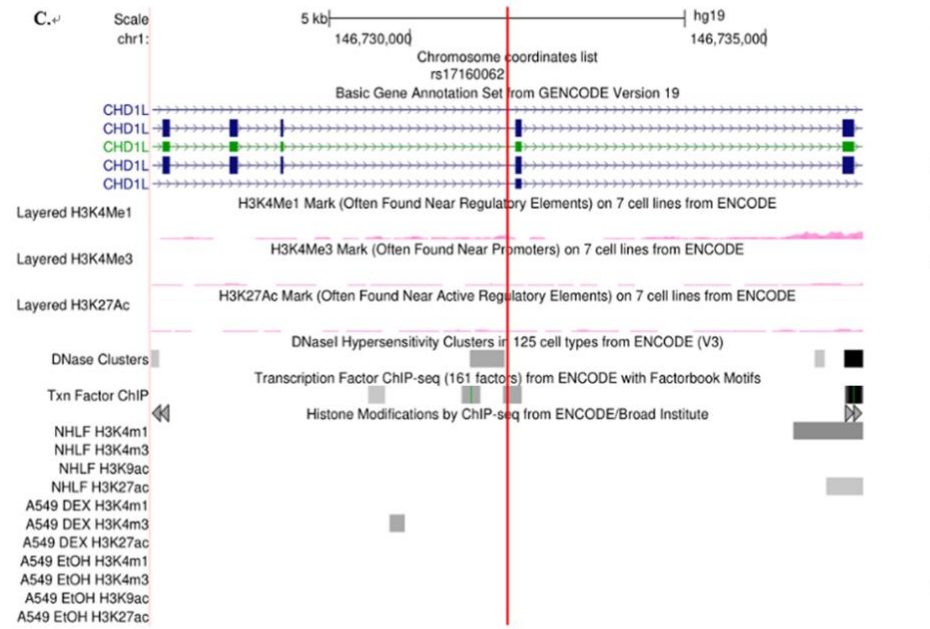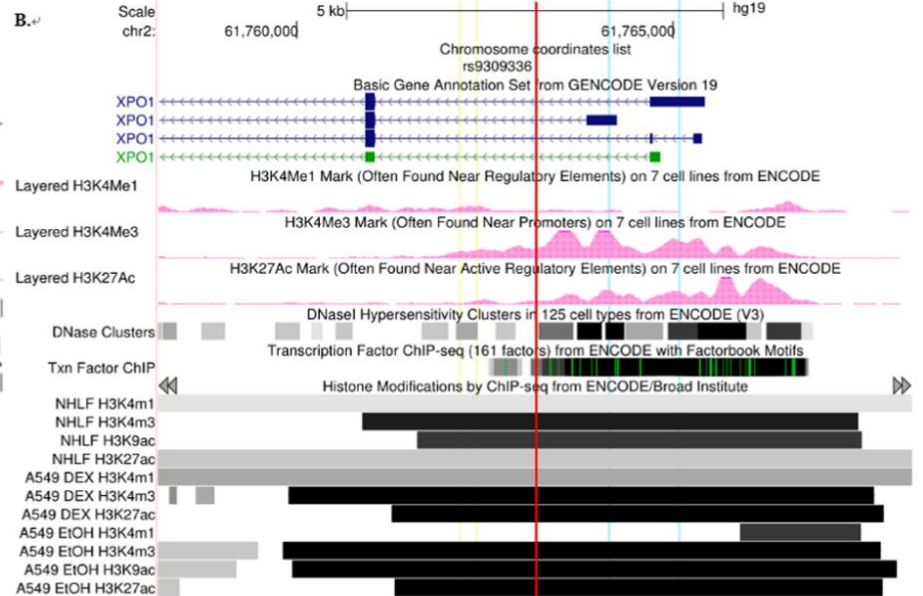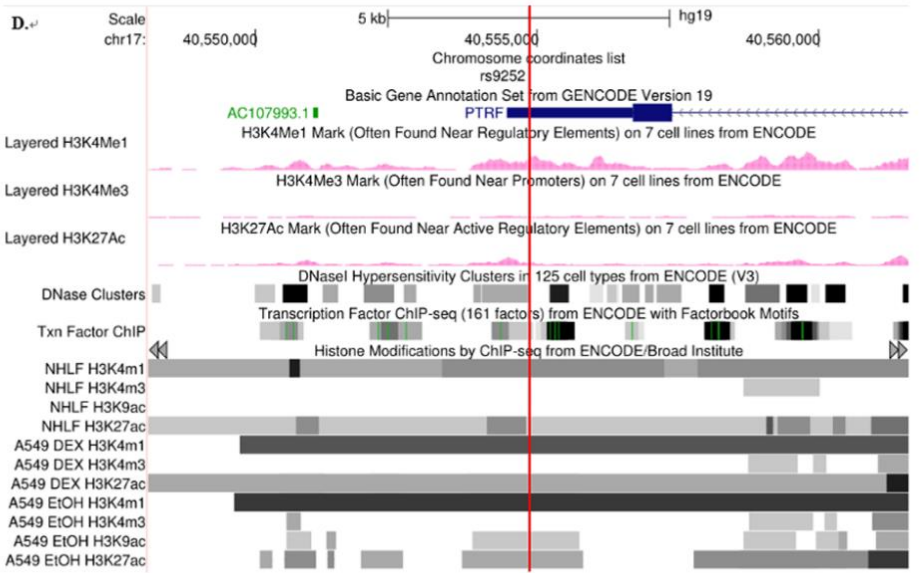

**Figure S2. Regulatory regions around 4 identified SNPs from ENCODE (Encyclopedia of DNA Elements).**

- (A) rs670343 at 2p23.3 was situated within the enhancer element (H3K4Me1 histone mark) on NHLF and A549 cell lines.
- (B) rs9309336 at 2p15 was situated within the enhancer element (H3K27Ac histone mark) and fell into the promoter element (H3K4Me3 mark) on NHLF and A549 cell lines.
- (C) rs17160062 at 1q21.1 located in the chromatin region with transcription factor binding signals by ChIP-seq.
- (D) rs9252 at 17q21.2 located in the peak of H3K4Me1 chromatin modification (NHLF and A549 cell lines) and the region enriched of DNase Hypersensitivity clusters and transcription binding site.
